# Supplementary material for: Interrogating heterobimetallic co-catalytic responses for the electrocatalytic reduction of CO2 using supramolecular assembly
Source: Royal Society of Chemistry journal article supplement (doi:10.1039/c6dt01956k), 2016-01-01
Supplement: c6dt01956k1.pdf [file c6dt01956k1.pdf]

**Interrogating Heterobimetallic Co-Catalytic Responses for the Electrocatalytic Reduction  
of CO<sub>2</sub> Using Supramolecular Assembly**

Charles W. Machan and Clifford P. Kubiak\*

*University of California – San Diego, Department of Chemistry and Biochemistry, 9500 Gilman  
Drive 0358, La Jolla, CA 92023*

Supporting Information

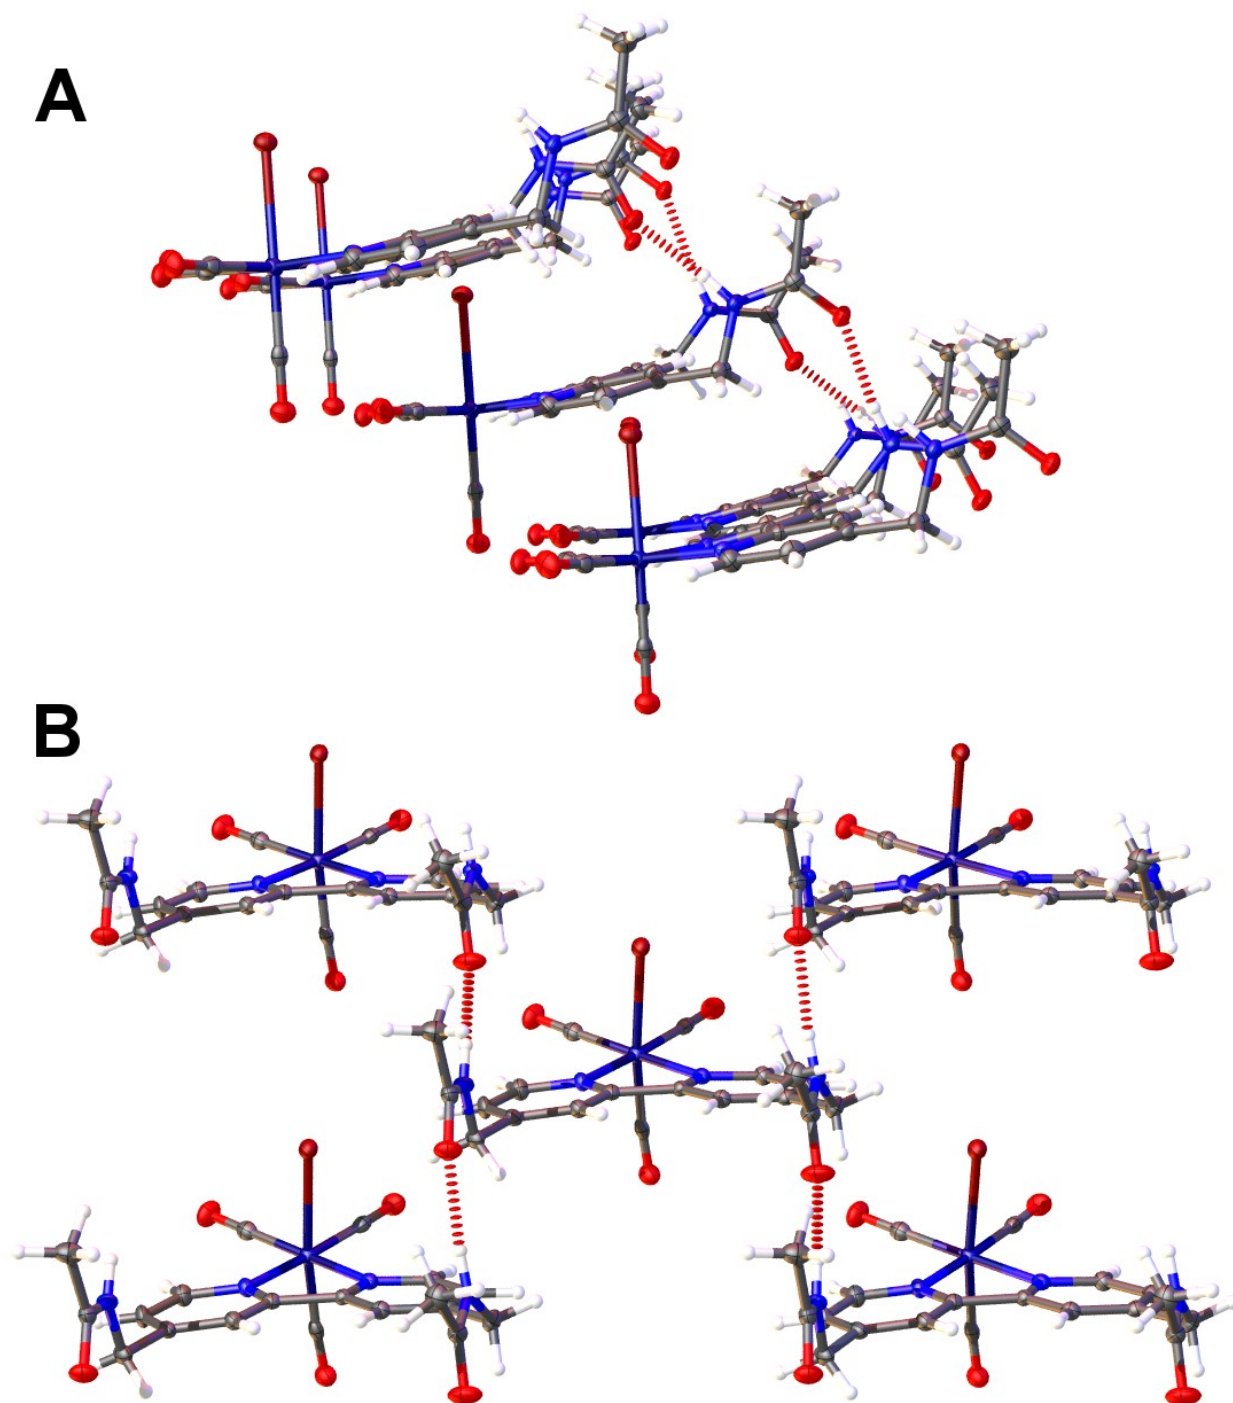

**Figure S1.** Side (A) and back (B) projections of  $\text{Mn}(\text{dacbp})(\text{CO})_3\text{Br}$  **2** obtained from the single crystal X-ray data. Thermal ellipsoids at 50%; C = gray, H = white, N = blue, O = red, Br = maroon, Mn = navy. Occluded MeCN molecule omitted for clarity, hydrogen bonds denoted by red disks.

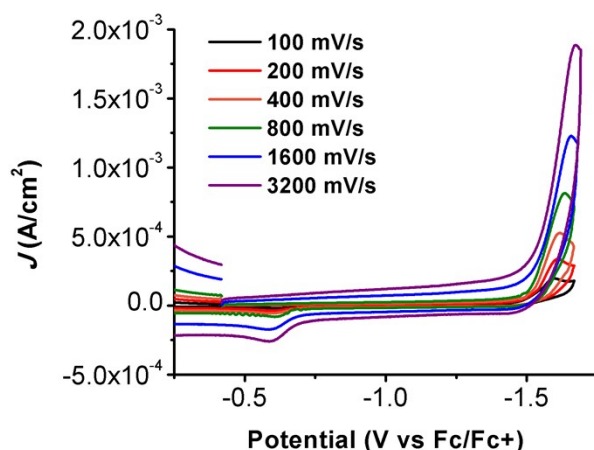

**Figure S2.** Variable-scan rate study of the cocat mixture under Ar saturation. Conditions: 0.1 M TBAPF<sub>6</sub>/MeCN; glassy carbon working electrode, Pt wire counter electrode, Ag/AgCl pseudo-reference electrode; referenced to internal Fc standard. Analyte concentration 1 mM each Re(**dacbpy**)(CO)<sub>3</sub>Cl **1** and Mn(**dacbpy**)(CO)<sub>3</sub>Br **2** in cocat mixture.

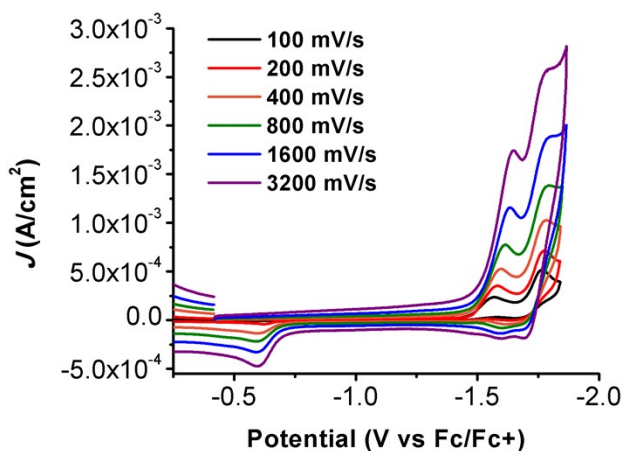

**Figure S3.** Variable-scan rate study of the cocat mixture under Ar saturation. Conditions: 0.1 M TBAPF<sub>6</sub>/MeCN; glassy carbon working electrode, Pt wire counter electrode, Ag/AgCl pseudo-reference electrode; referenced to internal Fc standard. Analyte concentration 1 mM each Re(**dacbpy**)(CO)<sub>3</sub>Cl **1** and Mn(**dacbpy**)(CO)<sub>3</sub>Br **2** in cocat mixture.

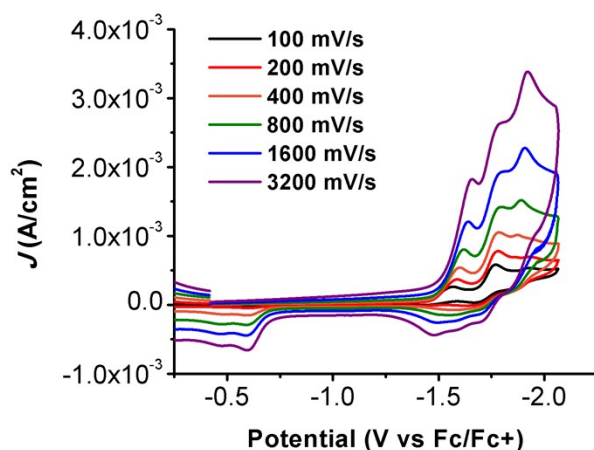

**Figure S4.** Variable-scan rate study of the cocat mixture under Ar saturation. Conditions: 0.1 M TBAPF<sub>6</sub>/MeCN; glassy carbon working electrode, Pt wire counter electrode, Ag/AgCl pseudo-reference electrode; referenced to internal Fc standard. Analyte concentration 1 mM each Re(**dacbp**y)(CO)<sub>3</sub>Cl **1** and Mn(**dacbp**y)(CO)<sub>3</sub>Br **2** in **cocat** mixture.

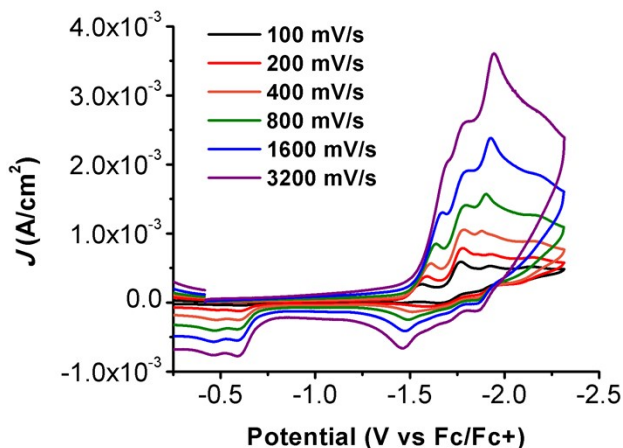

**Figure S5.** Variable-scan rate study of the cocat mixture under Ar saturation. Conditions: 0.1 M TBAPF<sub>6</sub>/MeCN; glassy carbon working electrode, Pt wire counter electrode, Ag/AgCl pseudo-reference electrode; referenced to internal Fc standard. Analyte concentration 1 mM each Re(**dacbp**y)(CO)<sub>3</sub>Cl **1** and Mn(**dacbp**y)(CO)<sub>3</sub>Br **2** in **cocat** mixture.

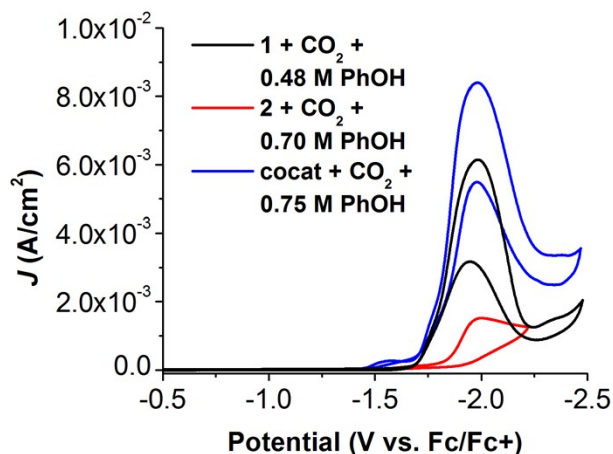

**Figure S6.** CVs showing the maximum current achieved through titration with PhOH for **1** (black), **2** (red), and **cocat** (blue) in MeCN under CO<sub>2</sub> saturation. CVs taken in 0.1 M TBAPF<sub>6</sub>/MeCN at 100 mV/s; glassy carbon working electrode, Pt wire counter electrode, Ag/AgCl pseudo-reference electrode behind CoralPor; referenced to internal Fc standard. Analyte concentration 1 mM each Re(**dacbpy**)(CO)<sub>3</sub>Cl **1** and Mn(**dacbpy**)(CO)<sub>3</sub>Br **2** in **cocat** mixture and 1 mM otherwise.

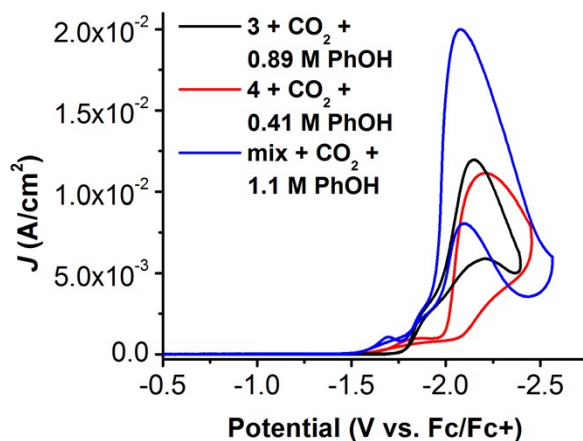

**Figure S7.** CVs showing the maximum current achieved through titration with PhOH for **3** (black), **4** (red), and an equimolar mixture of the two (blue) in MeCN under CO<sub>2</sub> saturation. CVs taken in 0.1 M TBAPF<sub>6</sub>/MeCN at 100 mV/s; glassy carbon working electrode, Pt wire counter electrode, Ag/AgCl pseudo-reference electrode behind CoralPor; referenced to internal Fc standard. Analyte concentration 1 mM each Re(**dmb**)(CO)<sub>3</sub>Cl **3** and Mn(**dmb**)(CO)<sub>3</sub>Br **4** in the mixture and 1 mM otherwise.

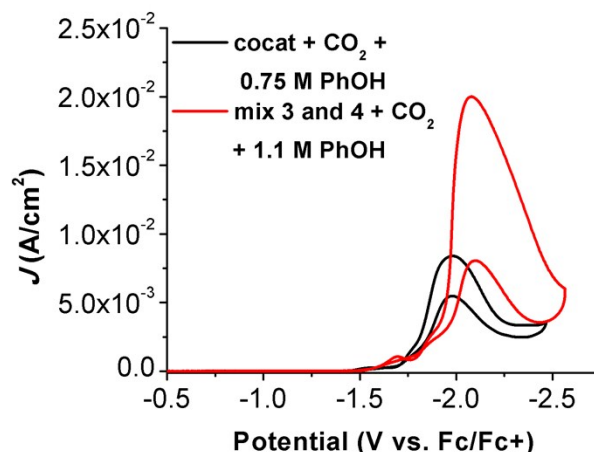

**Figure S8.** CVs showing the maximum current achieved through titration with PhOH for **cocat** (black) and a comparable equimolar mixture of **3** and **4** (red) in MeCN under CO<sub>2</sub> saturation. CVs taken in 0.1 M TBAPF<sub>6</sub>/MeCN at 100 mV/s; glassy carbon working electrode, Pt wire counter electrode, Ag/AgCl pseudo-reference electrode behind CoralPor; referenced to internal Fc standard. Catalyst concentration 1 mM each Re(**dacbp**y)(CO)<sub>3</sub>Cl **1** and Mn(**dacbp**y)(CO)<sub>3</sub>Br **2** for **cocat** or Re(**dmb**)(CO)<sub>3</sub>Cl **3** and Mn(**dmb**)(CO)<sub>3</sub>Br **4** for the mix.

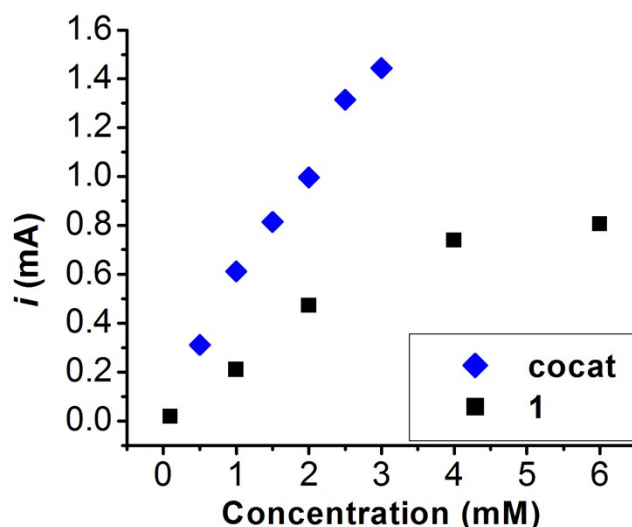

**Figure S9.** Plot of peak current response versus concentration for **cocat** (blue) and **1** (black); a linear trend is consistent with a first-order response according to the following equation:

$$i_{cat} = n_{cat}FA[cat](Dk_{cat}[Q])^{y/2}$$

- (1) Saveant, J.-M.; Vianello, E. *Electrochim. Acta* **1962**, *8*, 905–923.
- (2) Sampson, M.D.; Nguyen, A.D.; Grice, K.A.; Moore, C.E.; Rheingold, A.L.; Kubiak, C.P. *J. Am. Chem. Soc.* **2014**, *136*, 5460–5471.

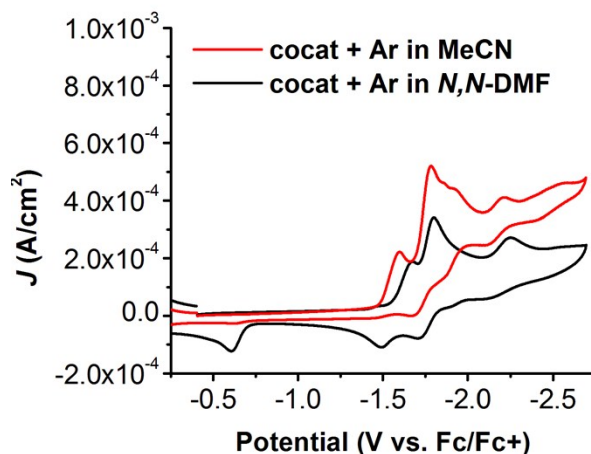

**Figure S10.** CVs of the **cocat** mixture taken at in MeCN (red) and *N,N*-DMF (black) under Ar saturation. CVs taken in 0.1 M TBAPF<sub>6</sub>/MeCN or *N,N*-DMF at 100 mV/s; glassy carbon working electrode, Pt wire counter electrode, Ag/AgCl pseudo-reference electrode behind CoralPor; referenced to internal Fc standard. Analyte concentration 1 mM each Re(**dacbpy**)(CO)<sub>3</sub>Cl **1** and Mn(**dacbpy**)(CO)<sub>3</sub>Br **2** in **cocat** mixture.

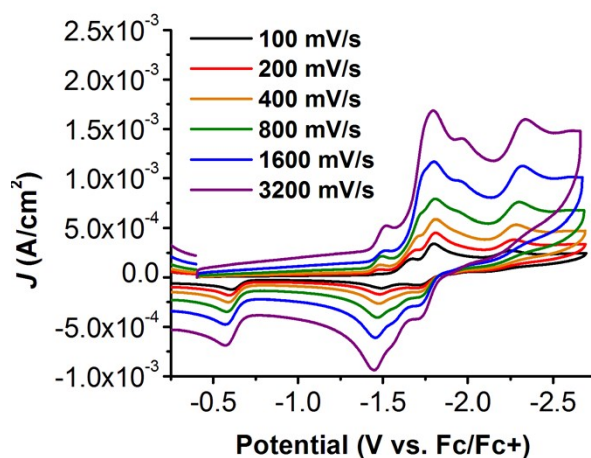

**Figure S11.** CVs of the **cocat** mixture taken *N,N*-DMF under Ar saturation at variable scan rates. CVs taken in 0.1 M TBAPF<sub>6</sub>/*N,N*-DMF; glassy carbon working electrode, Pt wire counter electrode, Ag/AgCl pseudo-reference electrode behind CoralPor; referenced to internal Fc standard. Analyte concentration 1 mM each Re(**dacbpy**)(CO)<sub>3</sub>Cl **1** and Mn(**dacbpy**)(CO)<sub>3</sub>Br **2** in **cocat** mixture.



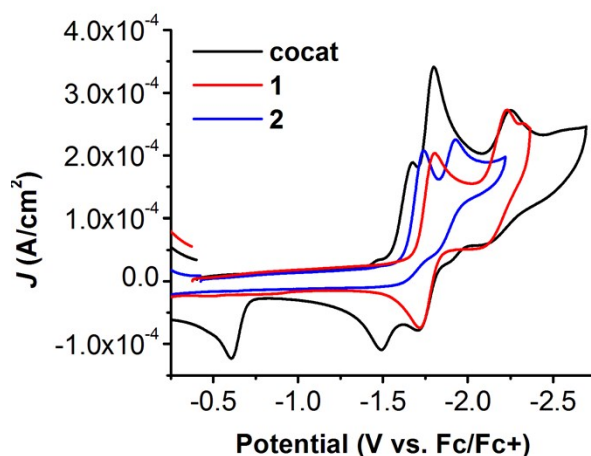

**Figure S12.** CVs of the **cocat** mixture (black), **1** (red), and **2** (blue) taken in *N,N*-DMF under Ar saturation. CVs taken in 0.1 M TBAPF<sub>6</sub>/*N,N*-DMF at 100 mV/s; glassy carbon working electrode, Pt wire counter electrode, Ag/AgCl pseudo-reference electrode behind CoralPor; referenced to internal Fc standard. Analyte concentration 1 mM each Re(**dacbp**y)(CO)<sub>3</sub>Cl **1** and Mn(**dacbp**y)(CO)<sub>3</sub>Br **2** in **cocat** mixture.

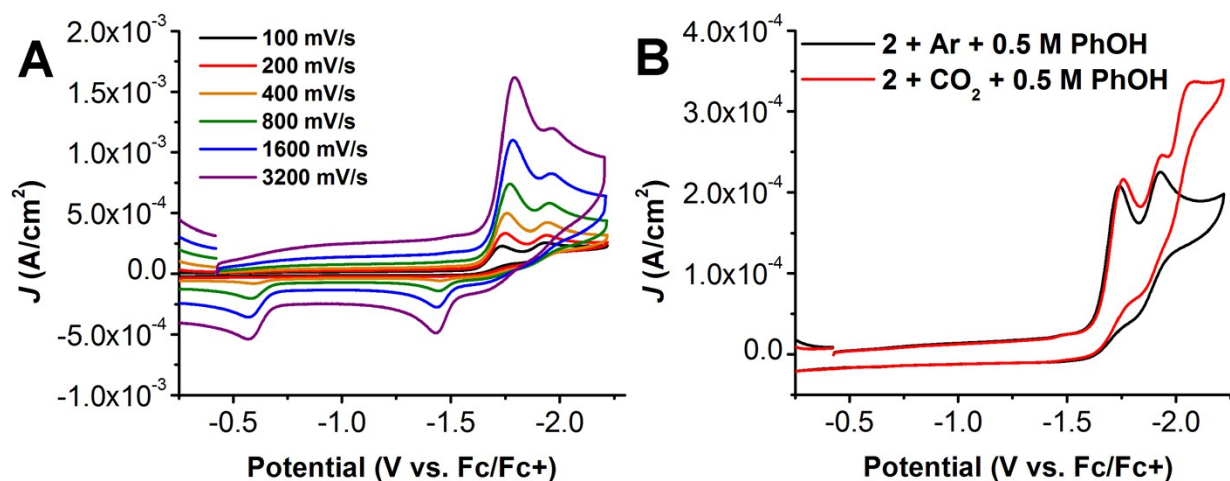

**Figure S13.** CVs of Mn(**dacbp**y)(CO)<sub>3</sub>Br **2** taken *N,N*-DMF under Ar saturation at variable scan rates. CVs taken in 0.1 M TBAPF<sub>6</sub>/*N,N*-DMF; glassy carbon working electrode, Pt wire counter electrode, Ag/AgCl pseudo-reference electrode behind CoralPor; referenced to internal Fc standard. Analyte concentration 1 mM.



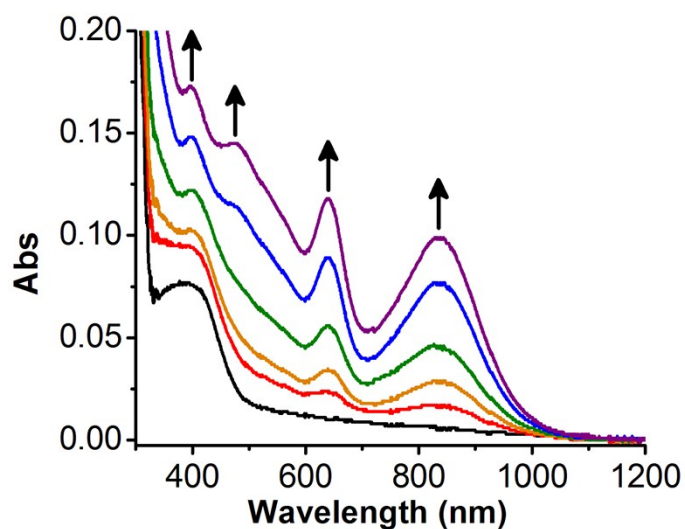

**Figure S14.** UV-Vis spectra of  $\text{Mn}(\text{dachpy})(\text{CO})_3\text{Br}$  **2** taken in MeCN with titration of  $\text{CoCp}^*_2$ . CVs taken in 0.1 M. Arrows denote features with increasing intensity. Starting concentration: 3 mM **2** in MeCN; 0.1 mm spacer,  $\text{CaF}_2$  windows.

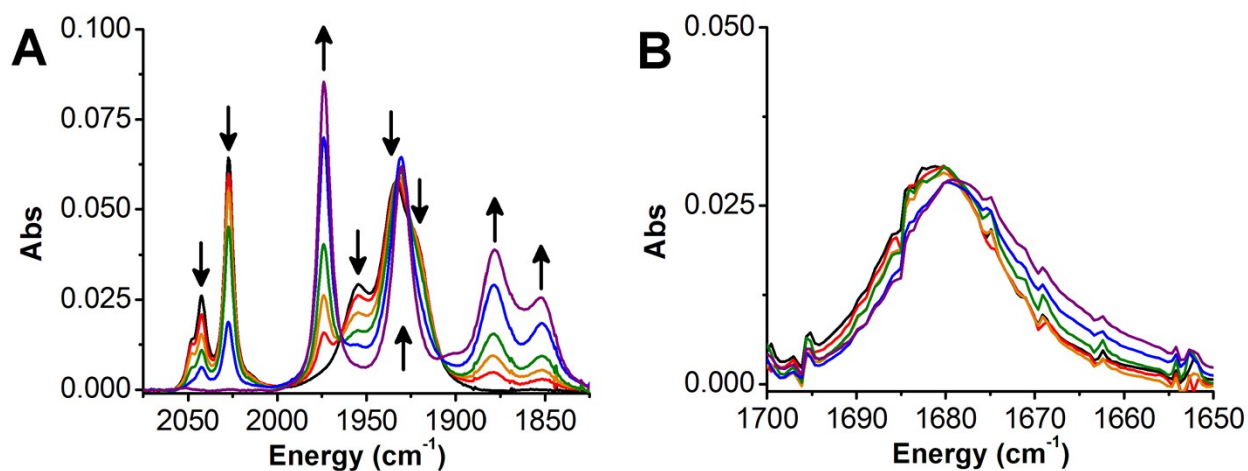

**Figure S15.** IR spectra of  $\text{Mn}(\text{dachpy})(\text{CO})_3\text{Br}$  **2** taken in MeCN with titration of  $\text{CoCp}^*_2$ . Arrows denote features with increasing or decreasing intensity. Starting concentration: 3 mM **2** in MeCN; 0.1 mm spacer,  $\text{CaF}_2$  windows.

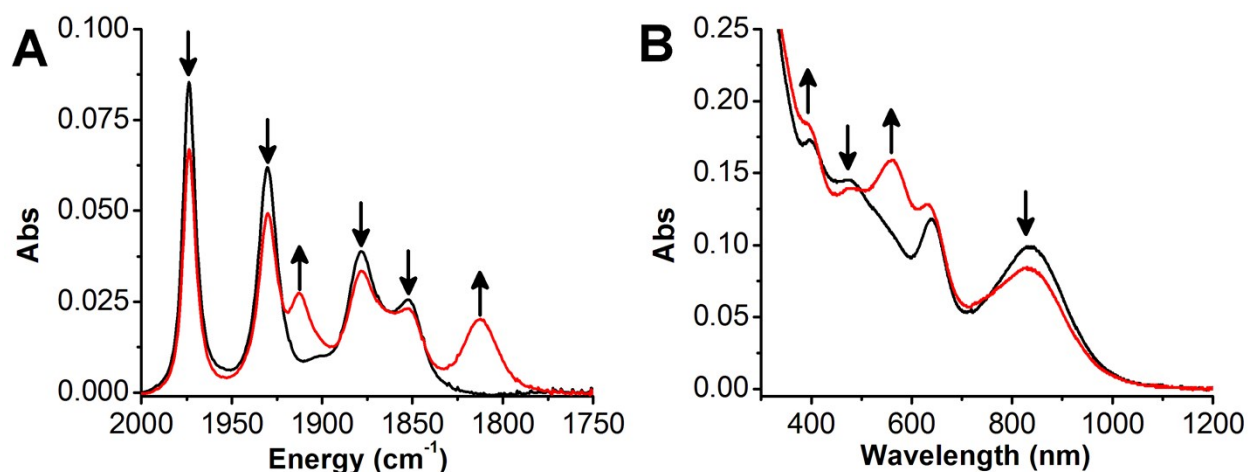

**Figure S16.** IR spectra (A) and UV-Vis spectra (B) of  $\text{Mn}(\text{dacbp}^*)(\text{CO})_3\text{Br}$  **2** taken in MeCN showing the generation of the monoanionic  $[\text{Mn}^0(\text{dacbp}^*)(\text{CO})_3]^-$  from titration of  $\text{CoCp}^*_2$  to the dimer  $[\text{Mn}^0(\text{dacbp}^*)(\text{CO})_3]_2$ . Arrows denote features with increasing or decreasing intensity. Starting concentration: 3 mM in MeCN; 0.1 mm spacer,  $\text{CaF}_2$  windows.

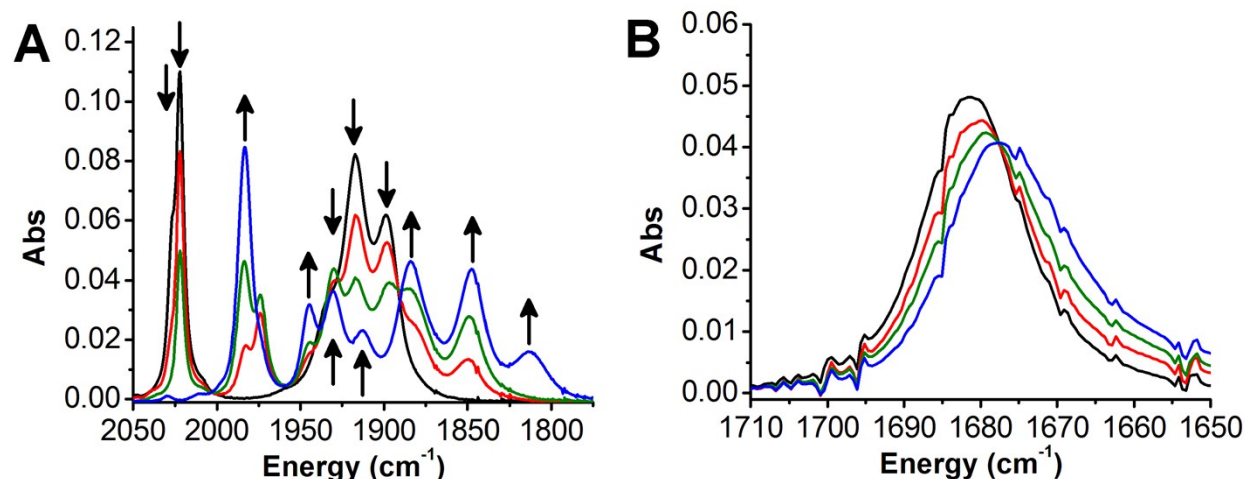

**Figure S17.** IR spectra of **cocat** taken in MeCN with titration of  $\text{CoCp}^*_2$ . Arrows denote features with increasing or decreasing intensity. Starting concentration 3 mM **cocat** (equimolar mixture of  $\text{Re}(\text{dacbp}^*)(\text{CO})_3\text{Cl}$  **1** and  $\text{Mn}(\text{dacbp}^*)(\text{CO})_3\text{Br}$  **2**) in MeCN; 0.1 mm spacer,  $\text{CaF}_2$  windows.

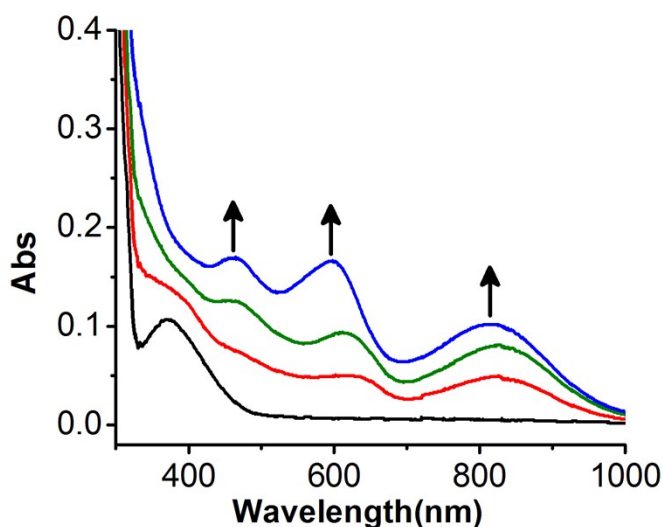

**Figure S18.** UV-Vis spectra of **cocat** taken in MeCN with titration of  $\text{CoCp}^*_2$ . Arrows denote features with increasing intensity. Starting concentration 3 mM **cocat** (equimolar mixture of  $\text{Re}(\text{dabcpy})(\text{CO})_3\text{Cl}$  **1** and  $\text{Mn}(\text{dabcpy})(\text{CO})_3\text{Br}$  **2**) in MeCN; 0.1 mm spacer,  $\text{CaF}_2$  windows.

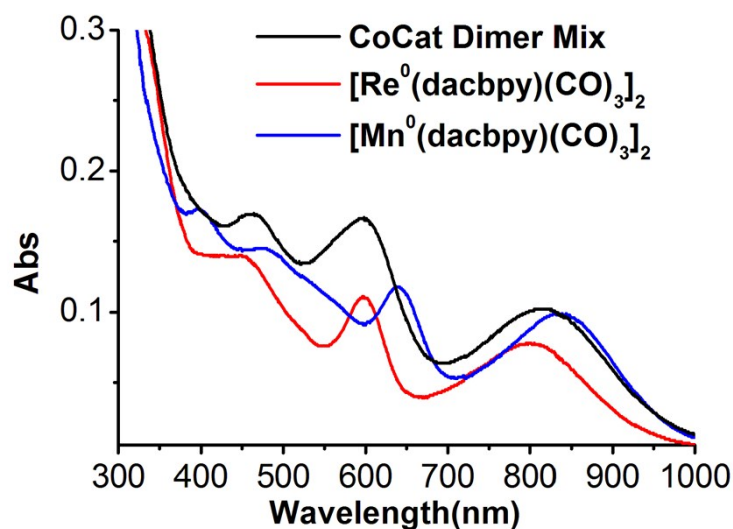

**Figure S19.** UV-Vis spectra of the metal-metal dimers of  $\text{Re}(\text{dabcpy})(\text{CO})_3\text{Cl}$  **1** (red) and  $\text{Mn}(\text{dabcpy})(\text{CO})_3\text{Br}$  **2** (blue) obtained through chemical reductions with  $\text{CoCp}^*_2$  overlaid with that obtained for **cocat** (equimolar mixture of  $\text{Re}(\text{dabcpy})(\text{CO})_3\text{Cl}$  **1** and  $\text{Mn}(\text{dabcpy})(\text{CO})_3\text{Br}$  **2**; black) after complete consumption of the starting material. The **cocat** mixture contains  $[\text{Mn}(\text{dabcpy})(\text{CO})_3]^-$ , resulting in a blue shift for metal-metal dimer absorbances. Starting concentration 3 mM in MeCN; 0.1 mm spacer,  $\text{CaF}_2$  windows.

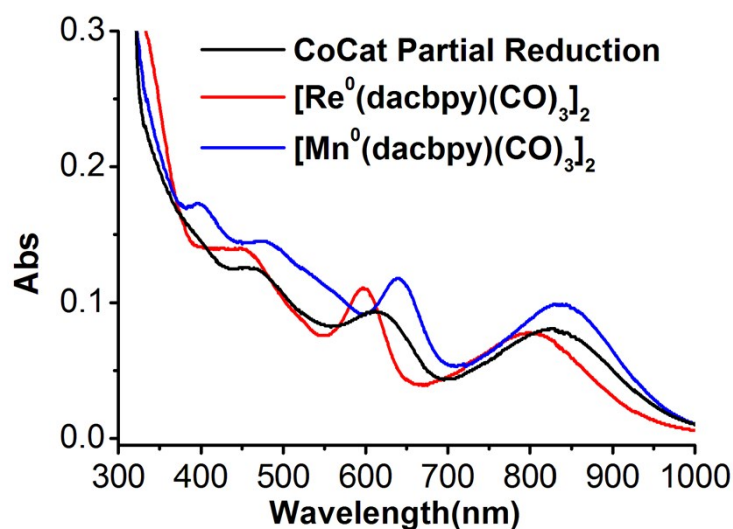

**Figure S20.** UV-Vis spectra of the metal-metal dimers of  $\text{Re}(\text{dacbpv})(\text{CO})_3\text{Cl}$  **1** (red) and  $\text{Mn}(\text{dacbpv})(\text{CO})_3\text{Br}$  **2** (blue) obtained through chemical reductions with  $\text{CoCp}^*_2$  overlaid with that obtained for **cocat** (equimolar mixture of  $\text{Re}(\text{dacbpv})(\text{CO})_3\text{Cl}$  **1** and  $\text{Mn}(\text{dacbpv})(\text{CO})_3\text{Br}$  **2**; black) before the appearance of  $[\text{Mn}(\text{dacbpv})(\text{CO})_3]^-$ . Starting concentration: 3 mM in MeCN; 0.1 mm spacer,  $\text{CaF}_2$  windows.

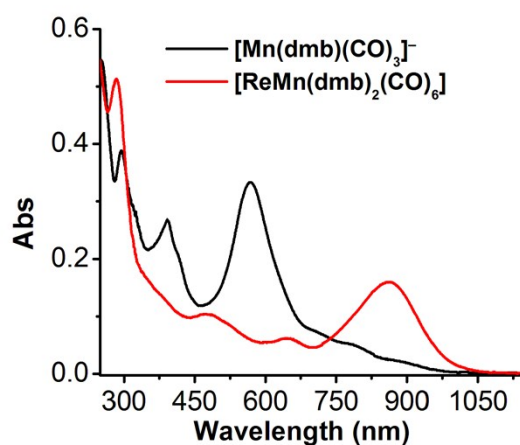

**Figure S21.** UV-Vis spectra of the  $[\text{Mn}(\text{dmb})(\text{CO})_3]\text{K}$  (black) and the product of the reaction with an equimolar amount of **3** (red) in chilled THF. Concentration 3 mM  $[\text{Mn}(\text{dmb})(\text{CO})_3]\text{K}$  and 3.0 mM  $[\text{ReMn}(\text{dmb})_2(\text{CO})_6]$ ; 0.1 mm spacer,  $\text{CaF}_2$  windows.

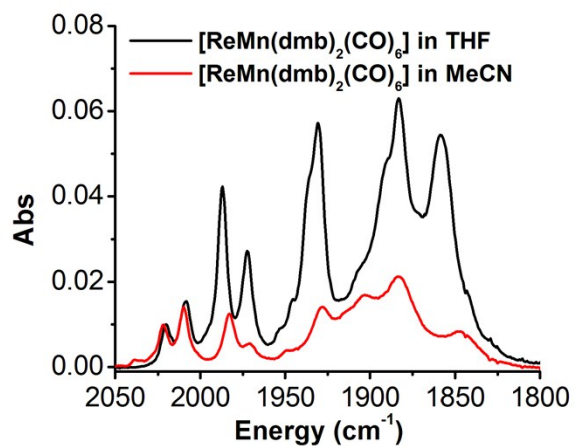

**Figure S22.** IR spectra of the [ReMn(dmb)<sub>2</sub>(CO)<sub>6</sub>] in THF (black) and MeCN (red). Concentration 3.0 mM; 0.1 mm spacer, CaF<sub>2</sub> windows.

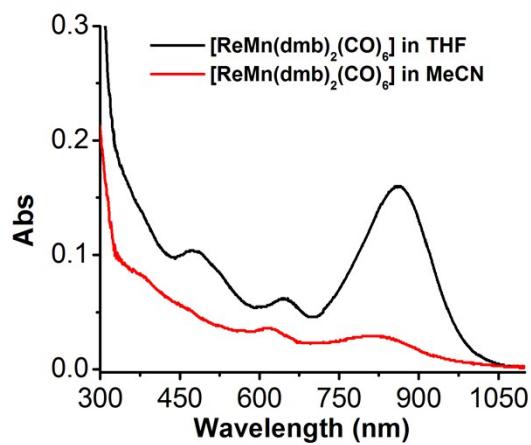

**Figure S23.** UV-Vis spectra of the [ReMn(dmb)<sub>2</sub>(CO)<sub>6</sub>] in THF (black) and MeCN (red). Concentration 3.0 mM; 0.1 mm spacer, CaF<sub>2</sub> windows.

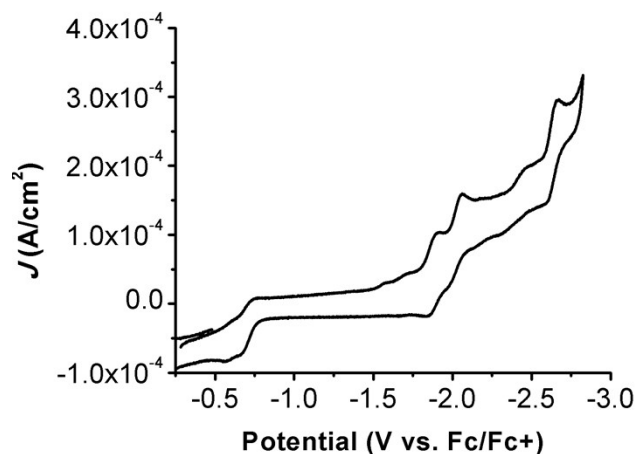

**Figure S24.** CV of  $[\text{ReMn}(\text{dmb})_2(\text{CO})_6]$  taken MeCN under Ar saturation. CVs taken in 0.1 M TBAPF<sub>6</sub>/MeCN; glassy carbon working electrode, Pt wire counter electrode, Ag/AgCl pseudo-reference electrode behind CoralPor; referenced to internal Fc standard. Analyte concentration 1 mM. Reduction features at -1.90, -2.06, -2.47, and -2.67 V (vs Fc/Fc<sup>+</sup>); oxidation features at -2.58, -1.97, -1.84, -0.65, and -0.56 V (vs Fc/Fc<sup>+</sup>).

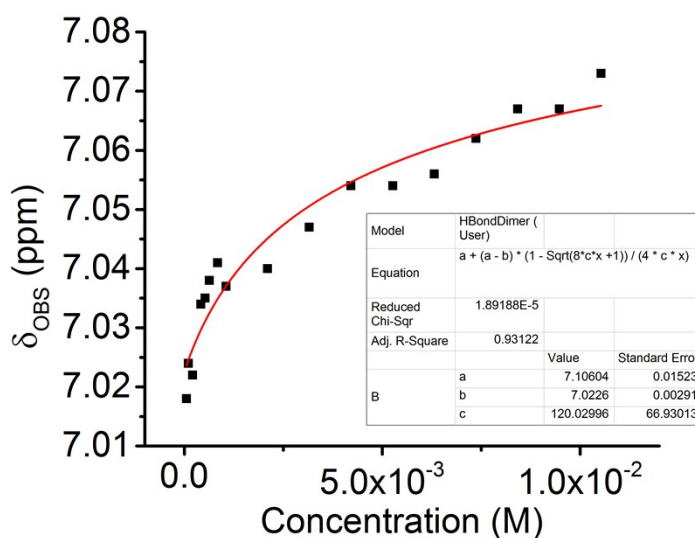

**Figure S25.** Determination of  $K_a$  for  $^1\text{H}$  NMR data of  $\text{Mn}(\text{dacbpY})(\text{CO})_3\text{Br}$  **2** by fitting to a 1:1 dimerization model.

**Table S1.** Crystal data for complex **2**.

|                                             |                                                                                                    |
|---------------------------------------------|----------------------------------------------------------------------------------------------------|
| Empirical formula                           | C <sub>19</sub> H <sub>18</sub> BrMnN <sub>4</sub> O <sub>5</sub> ·C <sub>2</sub> H <sub>3</sub> N |
| Formula weight                              | 558.27                                                                                             |
| Temperature/K                               | 100(2)                                                                                             |
| Crystal system                              | triclinic                                                                                          |
| Space group                                 | P <sub>-1</sub>                                                                                    |
| a/Å                                         | 8.4602(13)                                                                                         |
| b/Å                                         | 8.6080(15)                                                                                         |
| c/Å                                         | 17.623(3)                                                                                          |
| α/°                                         | 101.163(6)                                                                                         |
| β/°                                         | 95.668(5)                                                                                          |
| γ/°                                         | 112.647(5)                                                                                         |
| Volume/Å <sup>3</sup>                       | 1140.5(3)                                                                                          |
| Z                                           | 2                                                                                                  |
| ρ <sub>calc</sub> /g/cm <sup>3</sup>        | 1.626                                                                                              |
| μ/mm <sup>-1</sup>                          | 2.37                                                                                               |
| F(000)                                      | 564.3709                                                                                           |
| Crystal size/mm <sup>3</sup>                | 0.3 × 0.2 × 0.2                                                                                    |
| Radiation                                   | MoKα (λ = 0.71073)                                                                                 |
| 2θ range for data collection/°              | 4.80 to 52.82                                                                                      |
| Index ranges                                | -10 ≤ h ≤ 10, -10 ≤ k ≤ 10, -22 ≤ l ≤ 22                                                           |
| Reflections collected                       | 18832                                                                                              |
| Independent reflections                     | 4653 [R <sub>int</sub> = 0.0685, R <sub>sigma</sub> = 0.0667]                                      |
| Data/restraints/parameters                  | 3660/0/300                                                                                         |
| Goodness-of-fit on F <sup>2</sup>           | 1.0295                                                                                             |
| Final R indexes [I ≥ 2σ (I)]                | R <sub>1</sub> = 0.0154, wR <sub>2</sub> = 0.0356                                                  |
| Final R indexes [all data]                  | R <sub>1</sub> = 0.0169, wR <sub>2</sub> = 0.0362                                                  |
| Largest diff. peak/hole / e Å <sup>-3</sup> | 0.5595/-0.6397                                                                                     |

**Table S2.** Selected bond distances for complex **2**.

| Atom     | Atom       | Length/Å | Atom      | Atom     | Length/Å   |
|----------|------------|----------|-----------|----------|------------|
| Br1—Mn1  | 2.5355 (6) | N31—C29  | 1.133 (4) | Br1—Mn1  | 2.5355 (6) |
| Mn1—N4   | 2.047 (2)  | C19—C20  | 1.388 (4) | Mn1—N4   | 2.047 (2)  |
| Mn1—C21  | 1.812 (3)  | C19—C25  | 1.387 (4) | Mn1—C21  | 1.812 (3)  |
| Mn1—C22  | 1.809 (3)  | C13—C20  | 1.478 (4) | Mn1—C22  | 1.809 (3)  |
| Mn1—C10  | 1.803 (3)  | C13—C14  | 1.392 (4) | Mn1—C10  | 1.803 (3)  |
| Mn1—N0AA | 2.040 (2)  | C16—C1   | 1.518 (4) | Mn1—N0AA | 2.040 (2)  |
| O1—C15   | 1.231 (3)  | C20—N0AA | 1.362 (3) | O1—C15   | 1.231 (3)  |
| O9—C21   | 1.148 (4)  | C14—C26  | 1.386 (4) | O9—C21   | 1.148 (4)  |
| O3—C10   | 1.151 (3)  | C18—C24  | 1.383 (4) | O3—C10   | 1.151 (3)  |
| O7—C22   | 1.137 (3)  | C18—N0AA | 1.343 (3) | O7—C22   | 1.137 (3)  |
| O5—C16   | 1.235 (3)  | C23—C17  | 1.388 (4) | O5—C16   | 1.235 (3)  |
| N4—C13   | 1.351 (4)  | C23—C26  | 1.380 (4) | N4—C13   | 1.351 (4)  |
| N4—C17   | 1.341 (4)  | C15—C33  | 1.497 (4) | N4—C17   | 1.341 (4)  |



**Table S3.** Bulk electrolysis data.

| <b>Catalyst</b> | <b>[conc] (mM)</b> | <b>V (vs Ag/AgCl)</b> | <b>Efficiency for CO</b> | <b>Turnovers</b> | <b>PhOH (M)</b> |
|-----------------|--------------------|-----------------------|--------------------------|------------------|-----------------|
| <b>1</b>        | 1.0                | −2.2                  | 76%                      | 4.14             | 0.5             |
| <b>2</b>        | 1.0                | −2.2                  | 100%                     | 4.14             | 0.5             |
| <b>cocat</b>    | 0.5                | −2.2                  | 86%                      | 4.15             | 0.5             |

Bulk electrolyses were performed in a custom threaded glass jar from Chemglass fitted with a custom PEEK top containing ports for venting, fritted glass insert with counter electrode, working electrode, counter electrode, and a septum for sampling the headspace. The system was sealed with a combination of o-rings, Teflon tape, and electrical tape and tested for airtightness before each run. For an individual run the jar was charged with a known amount of catalyst, known amount of PhOH (0.5 M), stir bar, and an electrolyte solution (0.1 M TBAPF<sub>6</sub>/MeCN) before being sparged to saturation with CO<sub>2</sub>. In order to prevent polymerization of PhOH on the counter electrode, 0.1 M Fc was added to the electrolyte solution as a sacrificial oxidant. After a run was completed, the headspace was sampled via airtight syringe and characterized by GC such that Faradaic efficiency could be determined by using a calibration curve. A turnover for this system is based on two electron equivalents being passed for every catalyst molecule in solution; for every mole of catalyst two electrons are passed to achieve one turnover.
